# Supplementary material
Source: Springer Nature journal article supplement (http://www.nature.com/nature/journal/v528/n7581/extref/528193a-s1.pdf)
Supplement: 528193a-s1.pdf [file 528193a-s1.pdf]

## Supplementary information to: Push to decarbonize cities after Paris talks

Full list of co-signatories to a Correspondence published in Nature **528**, 193 (2015);  
<http://dx.doi.org/10.1038/528193a>

**Matthew Agarwala** *Grantham Research Institute on Climate Change and the Environment, London School of Economics and Political Science, UK; School of Environmental Sciences, University of East Anglia; Society, Economy and Environment Institute (SEE-I), University of Exeter, UK.*  
[m.k.agarwala@lse.ac.uk](mailto:m.k.agarwala@lse.ac.uk)

**Amy Binner** *Society, Economy and Environment Institute (SEE-I), University of Exeter, UK.*

**Helga Weisz** *Potsdam Institute for Climate Impact Research, Germany; and Humboldt-University zu Berlin, Germany.*

**Hans Joachim Schellnhuber** *Potsdam Institute for Climate Impact Research, Germany.*

**Peter Doherty** *University of Melbourne, Australia.*

**W. E. Moerner** *Stanford University, California, USA.*

**George F. Smoot** *Université Sorbonne Paris Cité, France; and University of California, Berkeley, California, USA.*
